# Supplementary material
Source: HighWire-hosted journal article supplement (https://bmjopen.bmj.com/content/12/6/e063608)
Supplement: inline-supplementary-material-3 [file inline-supplementary-material-3.pdf]

## SUPPLEMENT 3

## Trial registration

| Data category                                                                                                   | Information                                                                                                                                                                                                                                                                                                                                                                                                                                                                                          |
|-----------------------------------------------------------------------------------------------------------------|------------------------------------------------------------------------------------------------------------------------------------------------------------------------------------------------------------------------------------------------------------------------------------------------------------------------------------------------------------------------------------------------------------------------------------------------------------------------------------------------------|
| Registry identifying number                                                                                     | ISRCTN15564385                                                                                                                                                                                                                                                                                                                                                                                                                                                                                       |
| Date of registration                                                                                            | 07/02/2020                                                                                                                                                                                                                                                                                                                                                                                                                                                                                           |
| Prospective/Retrospective                                                                                       | Prospectively registered                                                                                                                                                                                                                                                                                                                                                                                                                                                                             |
| Additional identifiers                                                                                          | CPMS 43473, IRAS 269827                                                                                                                                                                                                                                                                                                                                                                                                                                                                              |
| Sources of monetary support                                                                                     | Versus Arthritis; National Institute for Health Research (NIHR) (UK)                                                                                                                                                                                                                                                                                                                                                                                                                                 |
| Sponsor                                                                                                         | University of Leeds                                                                                                                                                                                                                                                                                                                                                                                                                                                                                  |
| Contact information                                                                                             | Dr Dawn Groves-Williams; d.groves-williams@leeds.ac.uk<br>Dr Sarah Kingsbury; s.r.kingsbury@leeds.ac.uk                                                                                                                                                                                                                                                                                                                                                                                              |
| Short/public title                                                                                              | E-rehab for Knee Pain                                                                                                                                                                                                                                                                                                                                                                                                                                                                                |
| Scientific title                                                                                                | Evaluation of electronic-rehabilitation programmes for chronic knee pain                                                                                                                                                                                                                                                                                                                                                                                                                             |
| Countries of recruitment                                                                                        | United Kingdom                                                                                                                                                                                                                                                                                                                                                                                                                                                                                       |
| Condition category                                                                                              | Musculoskeletal Diseases                                                                                                                                                                                                                                                                                                                                                                                                                                                                             |
| Condition                                                                                                       | Chronic knee pain                                                                                                                                                                                                                                                                                                                                                                                                                                                                                    |
| Interventions                                                                                                   | Access to <b>My Knee UK</b> website containing exercise videos and self-management resources for 12 weeks. Support via SMS messages<br><b>Group E-Rehab</b> : access to online educational and self-management resources plus 7 online group physiotherapy classes over 12-weeks<br><b>Control Group</b> : depending on their recruitment path – will receive usual physiotherapy care or continue with usual self-management                                                                        |
| Key inclusion and exclusion criteria                                                                            | Type: Adults $\geq$ 45 years; both sexes; no healthy volunteers<br>Inclusion: knee pain > 3 months and on most days of previous month; activity-related joint pain; pain during walking $\geq$ 4 on an 11-point scale<br>Exclusion: Inflammatory arthritis/gout; Joint replacement in study knee; injection within last month; arthroscopy within last 3-months                                                                                                                                      |
| Study design                                                                                                    | Mixed methods interventional randomised controlled feasibility trial with follow-up interviews<br>Primary: Interventional; Secondary: Randomised controlled trial; Trial setting: Community; Trial type: treatment                                                                                                                                                                                                                                                                                   |
| Target sample size                                                                                              | 90 (30 in each group)                                                                                                                                                                                                                                                                                                                                                                                                                                                                                |
| Date of first enrolment                                                                                         | 22/04/2021                                                                                                                                                                                                                                                                                                                                                                                                                                                                                           |
| Recruitment status                                                                                              | Recruiting                                                                                                                                                                                                                                                                                                                                                                                                                                                                                           |
| Overall trial status                                                                                            | Ongoing                                                                                                                                                                                                                                                                                                                                                                                                                                                                                              |
| Key outcomes<br>(Primary and secondary outcomes have not been specified due to this being a feasibility study). | Participants and physiotherapists find e-rehabilitation feasible and acceptable, and it can be administered successfully; calculation of a sample size that can be achieved in a main trial; max. of 30% attrition at 3-months; $\geq$ 40-50% of eligible participants are recruited.<br>Patient-reported outcome domains are: pain; quality of life; pain coping and catastrophising; resource use; confidence and motivation to do exercises; global change in overall pain and mobility/function. |
